# Supplementary material for: Differences in the Suitable Distribution Area between Northern and Southern China Landscape Plants
Source: MDPI journal article supplement (doi:10.3390/plants12142710), 2023-07-20
Supplement: s1 [file s1]

## Supplementary Materials

**Table S1.** Normal test for SDA expansion data of northern landscape plants.

| Northern landscape plants | Statistics | Degree of freedom | Significance |
|---------------------------|------------|-------------------|--------------|
| 126:2021–2040             | 0.544      | 14                | 0.000        |
| 126:2041–2060             | 0.948      | 14                | 0.536        |
| 126:2061–2080             | 0.449      | 14                | 0.000        |
| 126:2081–2100             | 0.490      | 14                | 0.000        |
| 585:2021–2040             | 0.853      | 14                | 0.025        |
| 585:2041–2060             | 0.522      | 14                | 0.000        |
| 585:2061–2080             | 0.468      | 14                | 0.000        |
| 585:2081–2100             | 0.475      | 14                | 0.000        |

**Table S2.** Normal test for SDA expansion data of southern landscape plants.

| Southern landscape plants | Statistics | Degree of freedom | Significance |
|---------------------------|------------|-------------------|--------------|
| 126:2021–2040             | 0.780      | 15                | 0.002        |
| 126:2041–2060             | 0.770      | 15                | 0.002        |
| 126:2061–2080             | 0.811      | 15                | 0.005        |
| 126:2081–2100             | 0.825      | 15                | 0.008        |
| 585:2021–2040             | 0.794      | 15                | 0.003        |
| 585:2041–2060             | 0.787      | 15                | 0.003        |
| 585:2061–2080             | 0.792      | 15                | 0.003        |
| 585:2081–2100             | 0.815      | 15                | 0.006        |

**Table S3.** Normal test for SDA shrinkage data of northern landscape plants.

| Northern landscape plants | Statistics | Degree of freedom | Significance |
|---------------------------|------------|-------------------|--------------|
| 126:2021–2040             | 0.894      | 14                | 0.093        |
| 126:2041–2060             | 0.956      | 14                | 0.654        |
| 126:2061–2080             | 0.953      | 14                | 0.609        |
| 126:2081–2100             | 0.935      | 14                | 0.353        |
| 585:2021–2040             | 0.959      | 14                | 0.710        |
| 585:2041–2060             | 0.973      | 14                | 0.912        |
| 585:2061–2080             | 0.945      | 14                | 0.489        |
| 585:2081–2100             | 0.962      | 14                | 0.764        |

**Table S4.** Normal test for SDA shrinkage data of southern landscape plants.

| Southern landscape plants | Statistics | Degree of freedom | Significance |
|---------------------------|------------|-------------------|--------------|
| 126:2021–2040             | 0.735      | 15                | 0.001        |
| 126:2041–2060             | 0.509      | 15                | 0.000        |
| 126:2061–2080             | 0.522      | 15                | 0.000        |
| 126:2081–2100             | 0.606      | 15                | 0.000        |
| 585:2021–2040             | 0.651      | 15                | 0.000        |
| 585:2041–2060             | 0.578      | 15                | 0.000        |
| 585:2061–2080             | 0.575      | 15                | 0.000        |
| 585:2081–2100             | 0.557      | 15                | 0.000        |

**Table S5.** Normal test for mean SDA elevation change data of northern landscape plants.

| Northern landscape plants | Statistics | Degree of freedom | Significance |
|---------------------------|------------|-------------------|--------------|
| 126:2021–2040             | 0.883      | 14                | 0.063        |
| 126:2041–2060             | 0.817      | 14                | 0.008        |
| 126:2061–2080             | 0.698      | 14                | 0.000        |
| 126:2081–2100             | 0.897      | 14                | 0.101        |
| 585:2021–2040             | 0.756      | 14                | 0.001        |
| 585:2041–2060             | 0.887      | 14                | 0.074        |
| 585:2061–2080             | 0.923      | 14                | 0.241        |
| 585:2081–2100             | 0.859      | 14                | 0.030        |

**Table S6.** Normal test for mean SDA elevation change data of southern landscape plants.

| Southern landscape plants | Statistics | Degree of freedom | Significance |
|---------------------------|------------|-------------------|--------------|
| 126:2021–2040             | 0.906      | 15                | 0.118        |
| 126:2041–2060             | 0.949      | 15                | 0.510        |
| 126:2061–2080             | 0.982      | 15                | 0.982        |
| 126:2081–2100             | 0.918      | 15                | 0.182        |
| 585:2021–2040             | 0.955      | 15                | 0.606        |
| 585:2041–2060             | 0.955      | 15                | 0.611        |
| 585:2061–2080             | 0.939      | 15                | 0.371        |
| 585:2081–2100             | 0.936      | 15                | 0.337        |

**Table S7.** Normal test for latitudinal change in the SDA mass center data of northern landscape plants.

| Northern landscape plants | Statistics | Degree of freedom | Significance |
|---------------------------|------------|-------------------|--------------|
| 126:2021–2040             | 0.825      | 14                | 0.01         |
| 126:2041–2060             | 0.925      | 14                | 0.257        |
| 126:2061–2080             | 0.929      | 14                | 0.298        |
| 126:2081–2100             | 0.932      | 14                | 0.322        |
| 585:2021–2040             | 0.952      | 14                | 0.591        |
| 585:2041–2060             | 0.906      | 14                | 0.139        |
| 585:2061–2080             | 0.964      | 14                | 0.792        |
| 585:2081–2100             | 0.907      | 14                | 0.144        |

**Table S8.** Normal test for latitudinal change in the SDA mass center data of southern landscape plants.

| Southern landscape plants | Statistics | Degree of freedom | Significance |
|---------------------------|------------|-------------------|--------------|
| 126:2021–2040             | 0.91       | 15                | 0.136        |
| 126:2041–2060             | 0.913      | 15                | 0.152        |
| 126:2061–2080             | 0.936      | 15                | 0.334        |
| 126:2081–2100             | 0.925      | 15                | 0.227        |
| 585:2021–2040             | 0.897      | 15                | 0.085        |
| 585:2041–2060             | 0.932      | 15                | 0.296        |
| 585:2061–2080             | 0.924      | 15                | 0.222        |
| 585:2081–2100             | 0.95       | 15                | 0.528        |

**Table S9.** Homogeneity test of variance.

| Mean SDA elevation<br>change data | Levene<br>Statistics | Significance | Latitudinal change in<br>the SDA mass center<br>data | Levene<br>Statistics | Significance |
|-----------------------------------|----------------------|--------------|------------------------------------------------------|----------------------|--------------|
| 126:2021–2040                     | 0.278                | 0.602        | 126:2041–2060                                        | 0.919                | 0.346        |
| 126:2081–2100                     | 0.002                | 0.965        | 126:2061–2080                                        | 5.309                | 0.029        |
| 585:2041–2060                     | 2.095                | 0.159        | 126:2081–2100                                        | 2.578                | 0.12         |
| 585:2061–2080                     | 0.853                | 0.364        | 585:2021–2040                                        | 2.266                | 0.144        |
|                                   |                      |              | 585:2041–2060                                        | 2.543                | 0.122        |
|                                   |                      |              | 585:2061–2080                                        | 2.157                | 0.153        |
|                                   |                      |              | 585:2081–2100                                        | 6.959                | 0.014        |

**Table S10.** Interpretation of bioclimatic variables.

| Bioclimatic variables | Interpretation                                             |
|-----------------------|------------------------------------------------------------|
| bio-1                 | Annual Mean Temperature                                    |
| bio-2                 | Mean Diurnal Range (Mean of monthly (max temp - min temp)) |
| bio-3                 | Isothermality (bio-2/bio-7) (×100)                         |
| bio-4                 | Temperature Seasonality (standard deviation ×100)          |
| bio-5                 | Max Temperature of Warmest Month                           |
| bio-6                 | Min Temperature of Coldest Month                           |
| bio-7                 | Temperature Annual Range (bio-5~bio-6)                     |
| bio-8                 | Mean Temperature of Wettest Quarter                        |
| bio-9                 | Mean Temperature of Driest Quarter                         |
| bio-10                | Mean Temperature of Warmest Quarter                        |
| bio-11                | Mean Temperature of Coldest Quarter                        |
| bio-12                | Annual Precipitation                                       |
| bio-13                | Precipitation of Wettest Month                             |
| bio-14                | Precipitation of Driest Month                              |
| bio-15                | Precipitation Seasonality (coefficient of Variation)       |
| bio-16                | Precipitation of Wettest Quarter                           |
| bio-17                | Precipitation of Driest Quarter                            |
| bio-18                | Precipitation of Warmest Quarter                           |
| bio-19                | Precipitation of Coldest Quarter                           |

**Table S11.** Dominant climatic factors in northern landscape plants.

| Species                                           | Climatic factors and contribution rate/% |        |        |        |        |        |        |       |        |
|---------------------------------------------------|------------------------------------------|--------|--------|--------|--------|--------|--------|-------|--------|
| <i>Sorbaria sorbifolia</i>                        | bio-13                                   | bio-4  | bio-19 | bio-15 | elev   | bio-9  | bio-10 | bio-3 | bio-2  |
|                                                   | 34.1                                     | 30.2   | 13.9   | 11.9   | 4.9    | 4      | 0.4    | 0.4   | 0.3    |
| <i>Syringa reticulata</i> subsp. <i>amurensis</i> | bio-13                                   | bio-4  | elev   | bio-15 | bio-11 | bio-2  | bio-10 | bio-3 | bio-14 |
|                                                   | 31.7                                     | 18.1   | 17.5   | 13.2   | 12     | 4      | 2.9    | 0.4   | 0.2    |
| <i>Philadelphus schrenkii</i> Rupr.               | bio-12                                   | bio-4  | bio-9  | bio-15 | bio-3  | bio-10 | elev   |       |        |
|                                                   | 44.4                                     | 43.8   | 6.9    | 1.8    | 1.7    | 1.1    | 0.4    |       |        |
| <i>Rhododendron dauricum</i>                      | bio-4                                    | bio-13 | bio-1  | elev   | bio-14 | bio-3  | bio-15 |       |        |
|                                                   | 50.9                                     | 26.8   | 14.1   | 3.6    | 3.6    | 0.5    | 0.4    |       |        |
| <i>Caragana arborescens</i>                       | elev                                     | bio-9  | bio-12 | bio-4  | bio-15 | bio-3  | bio-8  |       |        |
|                                                   | 25.9                                     | 24.3   | 22.3   | 17.7   | 5.3    | 3.5    | 1.1    |       |        |
| <i>Acer truncatum</i>                             | bio-6                                    | bio-13 | bio-4  | elev   | bio-19 | bio-15 | bio-2  |       |        |
|                                                   | 35.2                                     | 24.5   | 16.5   | 11.6   | 7.3    | 3.7    | 1.2    |       |        |
| <i>Pinus tabuliformis</i>                         | bio-9                                    | bio-12 | elev   | bio-7  | bio-15 | bio-3  | bio-2  | bio-8 |        |
|                                                   | 37.6                                     | 28.4   | 15.7   | 8.4    | 4.6    | 4.4    | 0.8    | 0.1   |        |
| <i>Philadelphus tenuifolius</i>                   | bio-12                                   | bio-4  | bio-1  | elev   | bio-3  |        |        |       |        |
|                                                   | 43.8                                     | 41.1   | 10.9   | 3.9    | 0.3    |        |        |       |        |
| <i>Lonicera ruprechtiana</i>                      | bio-12                                   | bio-4  | bio-1  | elev   | bio-3  |        |        |       |        |

|                        |        |        |        |       |        |        |        |        |       |
|------------------------|--------|--------|--------|-------|--------|--------|--------|--------|-------|
|                        | 47.7   | 40.6   | 8.1    | 2     | 1.6    |        |        |        |       |
| <i>Syringa villosa</i> |        |        |        |       |        |        |        |        |       |
| subsp. <i>wolfii</i>   | bio-12 | bio-4  | elev   | bio-9 | bio-3  |        |        |        |       |
|                        | 43.6   | 32.9   | 11.5   | 10.3  | 1.7    |        |        |        |       |
| <i>Tilia amurensis</i> | bio-18 | bio-4  | bio-9  | elev  | bio-10 | bio-15 | bio-17 | bio-2  | bio-3 |
|                        | 41     | 21.3   | 18.2   | 8.6   | 4.4    | 2.2    | 1.7    | 1.4    | 1.2   |
| <i>Rhododendron</i>    |        |        |        |       |        |        |        |        |       |
| <i>schlippenbachii</i> | bio-13 | bio-1  | elev   | bio-3 | bio-19 | bio-15 |        |        |       |
|                        | 51.5   | 20.3   | 14.2   | 9.1   | 4.9    | 0.1    |        |        |       |
| <i>Rosa davurica</i>   | bio-4  | bio-13 | bio-10 | elev  | bio-9  | bio-19 | bio-3  | bio-15 | bio-2 |
|                        | 43.6   | 31.7   | 9.3    | 6     | 5      | 2      | 1.3    | 0.8    | 0.3   |
| <i>Ribes</i>           |        |        |        |       |        |        |        |        |       |
| <i>mandshuricum</i>    | bio-13 | bio-4  | bio-9  | elev  | bio-2  | bio-14 |        |        |       |
|                        | 38.2   | 20.5   | 20.5   | 16.4  | 2.3    | 2      |        |        |       |

---

**Table S12.** Dominant climatic factors in southern landscape plants.

| Species                          | Climatic factors and contribution rate/% |        |        |        |        |        |        |        |        |
|----------------------------------|------------------------------------------|--------|--------|--------|--------|--------|--------|--------|--------|
| <i>Adenanthera microsperma</i>   | bio-9                                    | bio-17 | bio-3  | elev   | bio-2  | bio-18 | bio-7  | bio-15 | bio-10 |
|                                  | 52.9                                     | 31.3   | 6.5    | 3.6    | 2.6    | 1.4    | 1      | 0.4    | 0.4    |
| <i>Adina pilulifera</i>          | bio-19                                   | bio-16 | bio-15 | bio-7  | Elev   | bio-11 | bio-3  | bio-5  |        |
|                                  | 79.7                                     | 15.6   | 1.6    | 1.4    | 0.8    | 0.5    | 0.3    | 0.2    |        |
| <i>Bougainvillea spectabilis</i> | bio-14                                   | bio-9  | bio-7  | bio-13 | bio-10 | elev   | bio-3  | bio-15 |        |
|                                  | 44.6                                     | 27.3   | 15     | 5.8    | 3.8    | 1.3    | 1.2    | 0.9    |        |
| <i>Callistemon rigidus</i>       | bio-19                                   | bio-9  | bio-7  | bio-8  | Elev   | bio-13 | bio-2  |        |        |
|                                  | 72.6                                     | 15.3   | 4.9    | 4.1    | 1.3    | 1      | 0.9    |        |        |
| <i>Delonix regia</i>             | bio-1                                    | bio-17 | bio-4  | bio-3  | bio-18 | elev   | bio-2  |        |        |
|                                  | 81.2                                     | 10.8   | 4.7    | 1.5    | 0.8    | 0.7    | 0.4    |        |        |
| <i>Elaeocarpus decipiens</i>     | bio-14                                   | bio-9  | bio-4  | elev   | bio-2  | bio-3  | bio-15 | bio-8  | bio-18 |
|                                  | 82.5                                     | 7.2    | 2.9    | 2.6    | 1.8    | 1      | 0.7    | 0.7    | 0.6    |
| <i>Fagraea ceilanica</i>         | bio-11                                   | bio-12 | bio-4  | bio-3  | bio-8  | elev   |        |        |        |
|                                  | 67                                       | 17.1   | 13.4   | 1.6    | 0.5    | 0.4    |        |        |        |
| <i>Jasminum sambac</i>           | bio-17                                   | bio-9  | bio-4  | bio-16 | Elev   | bio-3  | bio-15 | bio-8  |        |
|                                  | 57.3                                     | 32.1   | 5.1    | 3.7    | 1.2    | 0.4    | 0.1    | 0.1    |        |
| <i>Murraya exotica</i>           | bio-17                                   | bio-1  | bio-3  | bio-18 | bio-4  | bio-15 | elev   | bio-2  |        |
|                                  | 43.6                                     | 43.1   | 4.6    | 3.4    | 2.6    | 1.3    | 0.8    | 0.6    |        |
| <i>Hamelia patens</i>            | bio-14                                   | bio-7  | bio-1  | elev   | bio-3  | bio-16 |        |        |        |
|                                  | 72.6                                     | 22.5   | 2.6    | 1.9    | 0.3    | 0.1    |        |        |        |
| <i>Hibiscus rosa-sinensis</i>    | bio-9                                    | bio-17 | bio-3  | bio-7  | bio-2  | bio-8  | elev   |        |        |

|                          |        |        |        |        |        |        |        |      |
|--------------------------|--------|--------|--------|--------|--------|--------|--------|------|
|                          | 59.8   | 24.2   | 4.9    | 4.8    | 2.9    | 2      | 1.3    |      |
| <i>Plumeria rubra</i>    | bio-9  | bio-17 | bio-3  | bio-7  | Elev   | bio-8  | bio-13 |      |
|                          | 68.1   | 13.4   | 7.8    | 5.6    | 4.2    | 0.5    | 0.4    |      |
| <i>Rhodomyrtus</i>       |        |        |        |        |        |        |        |      |
| <i>tomentosa</i>         | bio-17 | bio-9  | bio-3  | bio-16 | bio-10 | bio-4  | bio-15 | elev |
|                          | 65.2   | 17.6   | 9.6    | 3.1    | 2      | 1.4    | 0.7    | 0.4  |
| <i>Senna surattensis</i> | bio-17 | bio-1  | bio-7  | elev   | bio-3  | bio-18 |        |      |
|                          | 47.5   | 44.1   | 4.8    | 1.8    | 1.6    | 0.1    |        |      |
| <i>Thevetia</i>          |        |        |        |        |        |        |        |      |
| <i>peruviana</i>         | bio-9  | bio-4  | bio-17 | bio-10 | bio-3  | elev   | bio-18 |      |
|                          | 72.1   | 13.1   | 7.5    | 2.8    | 2.5    | 1.1    | 1      |      |

---
